# Supplementary material
Source: PubMed Central journal article supplement (PMC7954080)

Choi et al\_Unmodified Gels\_for Extended Data Fig 6

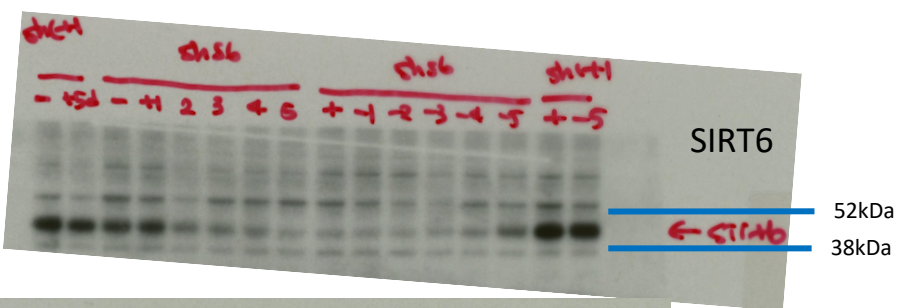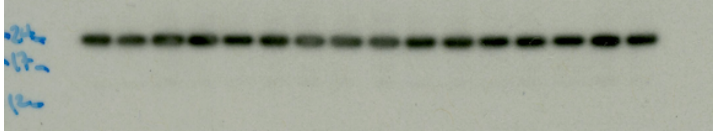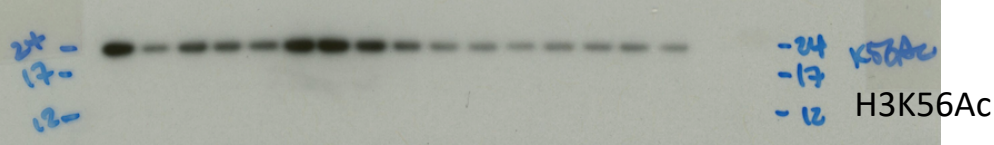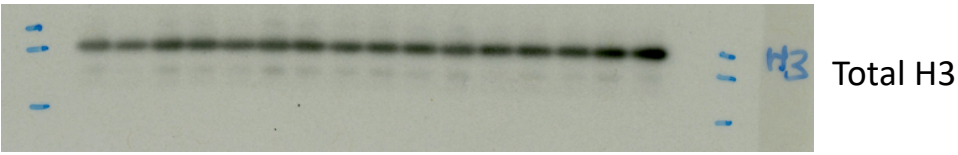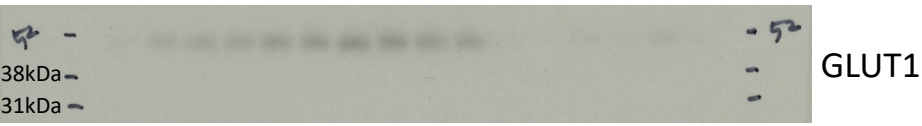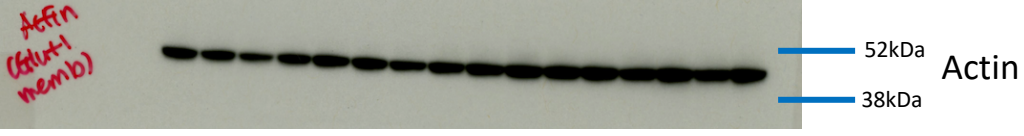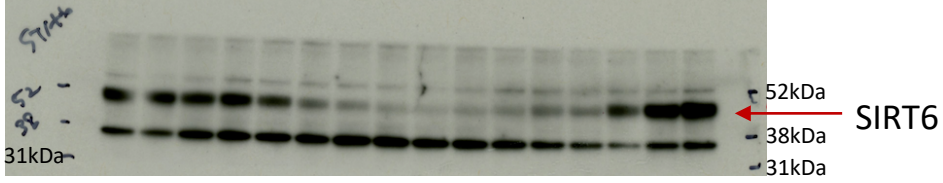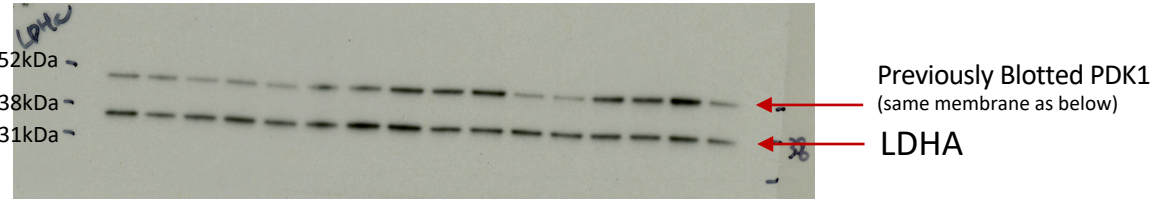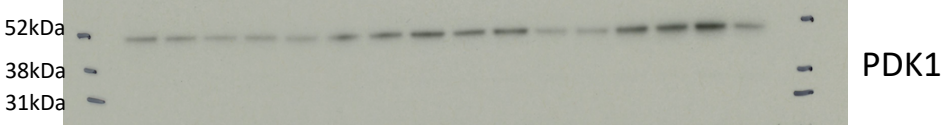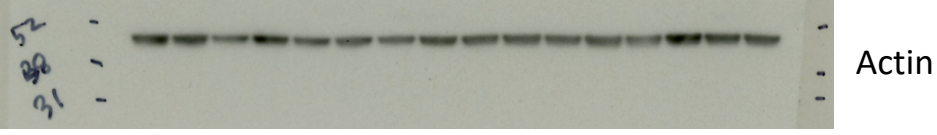

Supplement: NIHMS1665277-supplement-1665277_SourceExtDataFig6.pdf [file NIHMS1665277-supplement-1665277_SourceExtDataFig6.pdf]
